# Supplementary material for: Impact of methodological differences in task sequencing on second language learning: a multi-level meta-analysis
Source: publisher site journal article supplement (doi:10.1515/iral-2024-0219), 2025-03-12
Supplement: Supplementary file 1 [file j_iral-2024-0219_suppl_001.xlsx]

## Sheet: TS studies coding
Study identification				Theoretical accounts			Method																													Results									Findings
							Sample demographic information and setting								Data Collection Method													Prodution Targets				Data Codig Process	Data Analysis Method			Descriptive statistics					Inferential results
Author (year of publication)	Title	Publication type	Publication source	Task Sequencing Definition	Theoretical Framework	Research Questions	No of Partcipants	Participants' Age	First language	Proficiency Levels	Proficiency Test	Target language	Learning context	Educational setting	Modality	Task type	Task complexity variables	Task sequencing operationalizations	Cognitive load verification	Design type	Task performance comparison/ Pretest-posttest comparison	Methodology	Classroom/Lab	Random assignment		Face-to-face/Computer-mediated instruction	Groups	Complexity Metrics	Accuracy Metrics	Lexical Complexity Metrics	Fluency Metrics	Computer-based/Manual	Reliability checking	Normality checking	Statistical tests	No of participants in group	Structural Complexity: Mean (SD)	Accuracy: Mean (SD)	Lexical Complexity: Mean (SD)	Fluency: Mean (SD)	Complexity	Accuracy	Lexical Complexity	Fluency
Kim, N. (2023)	The effects of different task sequences on novice L2 learners’ oral performance in the classroom	Article A	Language Teaching Research	Sequencing tasks based on cognitive task complexity	Skehan's limited attentional resource capacity Levelt's speech production model Skehan's trade-off Hypothesis Robinson's triadic Componential Framework Deductive approach to tasks sequencing (Robinson's SSARC) Inductive approach to task sequencing (Skehan's task difficulty)	(1) To what extent do the three task sequence groups differ from each other in syntactic complexity, accuracy, and fluency of English in novice L2 learners’ oral performance? (2) To what extent does the task sequence manipulated by task complexity affect syntactic complexity, accuracy, and fluency of English in novice L2 learners’ oral performance? (3) To what extent does the task sequence manipu…	76 (45 females and 31 males)	18 to 25 years	Korean	Elementary	Narration rated based on the American Council on the Teaching of Foreign Languages (ACTFL) proficiency guideline	English	Foreign language context (FL)	University	Oral	Picture narrative	Resource-directing variables (± few elements and ± reasoning) Resource-dispersing variable (± planning)	Task 1: Simple (+ few elements, - reasoning, + planning with vocabulary/content guidance) Task 2: Medium (+ few elements, - reasoning, - planning Task 3: Complex ( - few elements, + reasoning, + planning with vocabulary/content guidance) Task 4: Plus Complex (- few elements, + reasoning, - planning)	None	Between-subject within subject pretest-treatment-posttest design	Pretest-posttest comparison	Quasi-experimental	Classroom	Not mentioned		Face-to-face	(1) Simple-complex (SC) group (2) SC plus planning with vocabulary guidance (GPV) (3) SC plus planning with content guidance (GPC) group	(1) Mean length of T-unit (MLT) (2) Mean length of AS-unit (MLU) (3) Clauses per AS-unit (C/AS) (4) Dependent clauses per clause (DC/C) (5) Mean length of clause (MLC) (6) Number of frequent tensed verbs (FreqT)	(1) Errors per AS-unit (E/AS) (2) Error-free clauses per clause (EFC/C) (3) Correct verb forms (CVF)	None	(1) Number of syllables per one minute (Syll/M) (2) Dysfluency ratio (DysFlu)	Manual	Yes	Yes	One-way ANOVA MANOVA Paired sample t-tests	SC group =16 SCV group = 16 SCC group = 17	MLT SC group: pretest: 9.62 (1.49) posttest: 11.63 (3.24) SCV group: pretest: 8.60 (1.66) posttest: 9.74 (1.82) SCC group: pretest: 9.01 (1.80) posttest: 9.87 (1.63) ########################## MLU SC group: pretest: 9.54 (1.47) posttest: 11.43 (3.31) SCV group: pretest: 8.45(1.64) posttest: 9.55 (1.51) SCC group: pretest:8.76 (1.67) posttest: 9.62 (1.59) ########################## C/AS SC group: …	E/AS SC group: pretest: .69 (.38) posttest: .92 (.54) SCV group: pretest: .75 (.44) posttest: .69 (.40) SCC group: pretest: 1.08 (.52) posttest: 1.01 (.67) ######################### EFC/C SC group: pretest: .59 (.23) posttest: .56 (.19) SCV group: pretest: .53 (.22) posttest: .62 (.16) SCC group: pretest: .39 (.26) posttest: .45 (.26) ######################## CVF SC group: pretest: .75 (.18) post…	None	Syll/M SC group: pretest: 88.79 (24.01) posttest: 105.38 (24.79) SCV group: pretest: 89.71 (25.34) posttest: 109.69 (27.67) SCC group: pretest: 74.82 (26.28) posttest:86.86 (27.42) ############################ DsyFlu SC group: pretest: 8.85 (6.24) posttest: 12.96 (12.16) SCV group: pretest: 10.43 (8.93) posttest: 6.67 (7.42) SCC group: pretest: 11.19 (9.15) posttest: 15.54 (11.95)	MLT SC > SCV SC > SCC SC: posttest> pretest SCV: posttest> pretest ############################ MLU SC > SCV SC > SCC SC: posttest> pretest SCV: posttest> pretest ############################ C/AS SC: posttest> pretest SCV: posttest> pretest SCC: posttest > pretest ############################ DC/C SC: posttest> pretest SCV: posttest> pretest SCC: posttest > pretest ########################### ML…	E/AS No effect ########################## EFC/C No effect ########################## CVF No effect	None	Syll/M SCV > SCC ######################## DysFlu SCC: posttest > pretest	SC sequence improved syntactic complexity (MLT, MLU, C/AS, DC/C, FreqT) and fluency (Syll/M, DsyFlu). SC with vocabulary guidance promoted syntactic complexity (MLT, MLU, C/AS, FreqT) and fluency (Syll/M). SC with content guidance improved syntactic complexity (C/AS, FreqT) and fluency (Syll/M). SC outperformed SCV and SCC in syntactic complexity (MLT, MLU) and SCV outperformed SCC in fluency (Sy…
Malicka, A. (2018)	The role of task sequencing in fluency, accuracy, and complexity: Investigating the SSARC model of pedagogic task sequencing	Article A	Language Teaching Research	Sequencing tasks based on cognitive task complexity	Robinson's SSARC model Robinson's triadic componential framework Robinson's cognition hypothesis Skehan's trade-off hypothesis Wicken's multiple attentional resource model	(1) Does performing a simple, complex, and the most complex task in the sequence from simple to complex, versus performing the same tasks in isolation, leads to qualitatively different output in terms of fluency, accuracy, and complexity?	87 (24 males and 63 females)	19 to 31 years	Spanish and Catalan	Intermediate	Oxford Placement Test (OPT)	English	FL	College	Oral	Decision-making	Resource-directing variables (± few elements and ± reasoning)	Task 1: Simple (+few elements, - reasoning) Task 2: Medium (- few elements, - reasoning) Task 3: Complex (-few elements, +reasoning)	Affective variables questionnaire (AVQ) Time judgment task (TJT) Stimulated recall (SR)	Between-subject within-subject mixed design	Task performance comparison	Quasi-experimental	Classroom	Not mentioned		Face-to-face	(1) SC group (2) Individual task group (No sequence group)	(1) Words per AS unit (W/AS) (2) Clauses per AS (C/AS) (3) Words per clause (W/C)	(1) Errors per AS-unit (E/AS) (2) Errors per 100 words (E/100W) (3) target-like use of prepositions (TLUP)	(1) Guiraud’s Index (GI) (2) D index (type–token ratio, TTR)	(1) Unpruned speech rate (USR) (2) Pruned speech rate (PSR) (3) Dsyfluency ratio (DysFlu)	Computer-based (CLAN version of CHILDES)	Yes	Yes	Mann–Whitney U-test	SC group =30 No group = 57	W/AS SC group: Simple: 9.02 (1.18) Medium: 9.05 (1.89) Complex: 9.02 (1.23) No group: Simple: 9.14 (1.36) Medium: 8.98 (1.27) Complex: 9.14 (1.37) ############################ C/AS SC group: Simple: 1.34 (.66) Medium: 1.36 (.24) Complex: 1.23 (.24) No group: Simple: 1.21 (.18) Medium: 1.31 (.28) Complex: 1.40 (.22) ############################ W/C SC group: Simple: 7.22 (1.36) Medium: 6.77 (1.42)…	E/AS SC group: Simple: .97 (.49) Medium: .96 (.71) Complex: .91 (.62) No group: Simple: 1.60 (1.17) Medium: 1.14 (.56) Complex: 1.10 (.57) ########################### E/100W SC group: Simple: 10.62 (6.17) Medium: 10.17 (5.52) Complex: 9.66 (6.16) No group: Simple: 17.32 (10.17) Medium: 12.94 (6.84) Complex: 12.56 (7.05) ########################### TLUP SC group: Simple: 68.12 (18.70) Medium: 71.7…	GI SC group: Simple: 5.36 (.63) Medium: 5.08 (.67) Complex: 5.12 (.59) No group: Simple: 5.06 (.83) Medium: 5.22 (.47) Complex: 5.33 (.74) ###################### TTR SC group: Simple: 44.32 (11.30) Medium: 47.07 (12.10) Complex: 52.32 (12.31) No group: Simple: 39.31 (10.81) Medium: 46.43 (11.06) Complex 49.44 (11.87)	USR SC group: Simple: 120.50 (26.38) Medium: 122.50 (22.66) Complex: 118.75 (26.63) No group: Simple: 95.22 (43.35) Medium: 113.27(35.01) Complex: 98.38 (34.99) ######################## PSR SC group: S: 111.22 (25.88) M: 110.35 (24.33) C: 107.26 (24.49) No group: Simple: 89.46 (42.39) Medium: 102.98 (32.88) Complex: 90.76 (34.77) ############################ DsyFlu SC group: Simple: 4.23 (1.94) M…	C/AS Simple: No effect Medium: No effect Complex: No > SC ######################### W/AS Simple: No effect Medium: No effect Complex: No effect ######################### W/C Simple: No effect Medium: No effect Complex: SC > No	E/AS Simple: No > SC Medium: No effect Complex: No effect ########################## E/100W Simple: No > SC Medium: No effect Complex: No effect ########################## TLUP Simple: SC > No Medium: SC > No Complex: No effect	GI No effect ##################### TTR No effect	USR Simple: SC > No Medium: No effect Complex: SC > No #################### PSR Simple: SC > No Medium: No effect Complex: SC > No #################### DsyFlu Simple: SC > No Medium: SC > No Complex: SC > No	SC sequence outperformed No sequence in fluency (all measures in simple and complex tasks, and Dysflu in medium task), enhanced accuracy (all measures in simple task and TLUP in complex task). Different patterns in structural complexity were observed: SC sequence improved W/AS while individual task performance promoted C/AS. Lexical complexity remained intact.
Korvesi, E. & Michel, M. (2022)	Chatting with Your Peers across Modalities: Effects of Performing Increasingly Complex Written Computer-Mediated Tasks on Oral L2 Development	Article B	Languages	Sequencing tasks based on cognitive task complexity	Dynamic usage-based (DUB) approaches Usage-based L2 instruction Form–use–meaning mappings Robinson's SSARC model Skehan's trade-off hypothesis	(1) How does a task-based text chat instructional intervention that has adopted the SSARC model of task complexity (Robinson 2015) for task sequencing affect the oral task-based performance of L2 learners as gauged by measures of fluency, global and task-specific accuracy, as well as a holistic measure of functional language use? (2) How does a task-based text chat instructional intervention that…	15 (4 males and 11 females)	average age of 19	Miscellaneous (They were from Syria, Iran, Gambia, Sudan, and Eritrea)	Low–intermediate	Internal placement test	English	Second language (SL) context	Language institute	Oral & Written	Picture narrative	Resource-directing variable (± few elements)	Task 1: Simple (fewest elements) Task 2: Medium (several elements) Task 3: Complex (most elements)	Task difficulty questionnaire	Between-subject within subject pretest-treatment-posttest design	Pretest-posttest comparison	Mixed method: Quantitative (quasi-experimental)→Qualitative	Classroom	Not mentioned		Computer-mediated instruction	(1) SC group	None	(1) 1st grade errors (2) 2nd grade errors (3) 3rd grade errors (4) Errors per 50 words (E/50W) (5) Correct use of present continuous (6) Correct use of existential ‘there is/are’ (7) Correct use of can + infinitive	None	Oral (1) speaking rate (SR) (2) average length of pauses ######### Written (1) total number of clauses (2) total number of words	Manual	Yes	Not mentioned	Paired-sample t-tests # Wilcoxon signed-rank tests # Correlation matrix analyses	SC group = 15	None	ORAL: 1st grade errors SC group: Pretest: .071 (.18) Posttest: .43 (.38) ########################### 2nd grade errors SC group: Pretest: 5.43 (2.56) Posttest: 3.64 (1.98) ########################### 3rd grade errors SC group: Pretest: 1.07 (.91) Posttest: .53 (.94) ########################### E/50W SC group: Pretest: 5.20 (1.94) Posttest: 2.70 (1.59) ########################### Use of present con…	None	ORAL: SR SC group: Pretest: 1.63 (.97) Posttest: 1.76 (.58) ######################## Average length of pauses SC group: Pretest: 2.63 (1.66) Posttest: 1.65 (1.12) ############################## WRITTEN: Number of Clauses SC group: Pretest: 4.40 (2.06) Posttest: 6.13 (2.07) ######################## Number of Words SC group: Pretest: 50.6 (19.4) Posttest: 59.1 (19.5)	None	ORAL: 1st grade errors SC: pretest > posttest ########################### 2nd grade errors SC: Pretest > posttest ########################### 3rd grade errors SC: No effect ########################### E/50W SC: Pretest > posttest ########################### Use of present continuous SC: posttest > pretest ########################### Use of existential ‘there is/are’ SC: No effect ################…	None	ORAL: SR SC: No effect ######################## Average length of pauses SC: pretest > posttest ########################### WRITTEN: Number of Clauses SC: Posttest > Pretest ######################## Number of Words SC: No effect	SC sequencing led to greater fluency (average length of pauses in oral production and number of clauses in written production) and global and task-specific accuracy (2nd grade errors, E/50W, and use of present continuous and can + infinitive in oral and written production) in both modes. Written CMC is a good method of preparation for FtF interactions.
Malicka, A. (2014a)	The role of task complexity and task sequencing in L2 monologic oral production	Dissertation	The University of Barcelona, Spain	Sequencing tasks based on cognitive task complexity	Robinson's SSARC model Robinson's triadic componential framework Robinson's cognition hypothesis Skehan's trade-off hypothesis Wicken's multiple attentional resource model	1(a) How do tasks of different cognitive complexity levels, as manipulated along the variables ±reasoning demands and ±number of elements, affect task performance in the condition of sequences, as measured by fluency, accuracy, and complexity? 1(b) How do tasks of different cognitive complexity levels, as manipulated along the variables ±reasoning demands and ±number of elements, affect individua…	117	19 to 31 years	Spanish and Catalan	Intermediate	Oxford Placement Test	English	FL	College	Oral	Decision-making	Resource-directing variables (± few elements and ± reasoning)	Task 1: Simple (+ few elements, - reasoning) Task 2: Medium (- few elements, - reasoning) Task 3: Complex (- few elements, + reasoning)	AVQ TJT SR	Between-subject within-subject mixed design	Task performance comparison	Quasi-experimental	Classroom	Not mentioned		Face-to-face	(1) No group (2) SC group (3) Randomized (RAN) group	(1) Words per clause (W/C) (2) Words per AS-unit (W/AS) (3) clauses per AS-unit (C/AS)	(1) Errors per AS-unit (E/AS) (2) Errors per 100 words (E/100W) (3) Target-like use of prepositions (TLUP)	1) D index, 2) Guiraud’s index (GI)	1) Unpruned speech Rate (USR) (2) Pruned speech Rate (PSR) (3) Dysfluency ratio (DsyFlu)	Computer-based (CLAN version of CHILDES)	Not mentioned	Yes	One-way repeated measures ANOVA Wilcoxon signed-ranks test Mann-Whitney U-test	No group = 57 SC group = 30 RAN group = 30	W/C SC group: Simple: 7.22 (1.36) Medium: 6.77 (1.42) Complex: 7.60 (1.84) RAN group: Simple: 7.52 (.83) Medium: 6.79 (1.06) Complex: 7.16 (1.25) No group: Simple: 7.68 (1.40) Medium: 7.17 (1.98) Complex: 6.57 (.58) ############################# W/AS SC group: Simple: 9.02 (1.18) Medium: 9.05 (1.89) Complex: 9.02 (1.23) RAN group: Simple: 9.53 (1.63) Medium: 9.31 (1.63) Complex: 9.37 (1.39) No gr…	E/AS SC group: Simple: .97 (.49) Medium: .96 (.71) Complex: .91 (.62) RAN group: Simple: 1.19 (.52) Medium: 1.18 (.60) Complex: 1.03 (.50) No group: Simple: 1.60 (1.17) Medium: 1.14 (.56) Complex: 1.10 (.57) ####################### E/100W SC group: Simple: 10.62 (6.17) Medium: 10.17 (5.52) Complex: 9.66 (6.16) RAN group: Simple: 12.44 (5.58) Medium: 12.55 (6.32) Complex: 11.31 (6.40) No group: Si…	D SC group: Simple: 44.32 (11.30) Medium: 47.07 (12.10) Complex: 52.32 (12.31) RAN group: Simple: 45.41 (13.41) Medium: 50.82 (12.70) Complex: 56.43 (12.50) No group: Simple: 39.31 (10.81) Medium: 46.43 (11.06) Complex: 49.44 (11.87) ############################ GI SC group: Simple: 5.36 (.63) Medium: 5.08 (.67) Complex: 5.12 (.59) RAN group: Simple: 5.44 (.84) Medium: 5.28 (.76) Complex: 5.44 (.…	USR SC group: Simple: 120.5 (26.38) Medium: 122.50 (25.66) Complex: 118.75 (26.63) RAN group: Simple: 124.39 (26.77) Medium: 128.87 (32.11) Complex: 122.54 (29.64) No group: Simple: 95.22 (43.35) Medium: 113.27 (35.01) Complex: 98.38 (34.99) ############################ PSR SC group: Simple: 111.22 (25.88) Medium:110.35 (24.33) Complex: 107.26 (24.49) RAN group: Simple: 116.45 (25.92) Medium: 118…	W/C Task complexity in sequencing groups Simple > Medium Complex > Simple Task complexity in individual task Simple > Medium Complex > Simple Task sequencing: SC vs. RAN SC: Simple > Medium RAN: Simple > Medium; Complex > Simple Task sequencing: SC vs. Ind Simple: No effect between groups Medium: No effect between groups Complex: No effect between groups ############################# W/AS Task co…	E/AS Task complexity in sequencing groups Simple > Complex Task complexity in individual task No effect Task sequencing: SC vs. RAN SC: No effect across tasks RAN: Simple > Medium; Medium > Complex; Simple > Complex Task sequencing: SC vs. Ind Simple: Ind > SC Medium: No effect between groups Complex: No effect between groups ####################### E/100W Task complexity in sequencing groups Sim…	DI Task complexity in sequencing groups Simple > Medium Medium > Complex Simple > Complex Task complexity in individual task Complex > Simple Task sequencing: SC vs. RAN No effect Task sequencing: SC vs. Ind No effect between groups ############################ GI Task complexity in sequencing groups No effect Task complexity in individual task No effect Task sequencing: SC vs. RAN No effect Task…	USR Task complexity in sequencing groups No effect Task complexity in individual task No effect Task sequencing: SC vs. RAN SC: No effect across tasks RAN: Simple > Medium; Medium > Complex; Simple > Complex Task sequencing: SC vs. Ind Simple: SC > Ind Medium: No effect between groups Complex: SC > Ind ############################ PSR Task complexity in sequencing groups No effect Task complexity…	Concerning task complexity, both sequencing ( including both SC and RAN) and individual groups promoted accuracy and lexical complexity. The groups showed different patterns in structural complexity: In sequencing group, structural complexity remained the same across tasks while in individual group, subordination (C/AS) improved and phrasal complexity (W/C) decreased. The groups showed different …
Levkina, M. (2013)	The role of task sequencing in L2 development as mediated by working memory capacity	Dissertation	The University of Barcelona, Spain	Sequencing tasks based on cognitive task complexity	Robinson's SSARC model Robinson's triadic componential framework Robinson's cognition hypothesis Skehan's trade-off hypothesis Skehan's limited attentional capacity	1) Does manipulating task complexity from simple to complex affect learners’ reported perception of cognitive complexity? 2) Is there any effect of task sequencing from simple to complex on L2 development of spatial expressions? If so, what is the effect of task sequencing on L2 development of spatial expressions? 3)Does Working Memory Capacity moderate L2 development as affected by task sequenci…	61 (13 males and 48 females)	average age of 24.76	Spanish	Intermediate	Internal placement test	English	FL	University	Oral	Picture description	Resource-directing variables (± spatial reasoning, ± perspective-taking)	Task 1: Simple (- spatial reasoning, - perspective-taking) Task 2: Medium (+ spatial reasoning, - perspective-taking) Task 3: Complex ( + spatial reasoning, + perspective-taking )	AVQ TJT	Between-subject within-subject pretest-treatment-posttest- delayed posttest design	Pretest-posttest comparison	Experimental	Classroom & Lab	Random assignment		Face-to-face	(1) SC group (2) RAN group	None	(1) Number of correct expressions (NCE) (2) Number of targets (NT) (3) Number of correct targets (NCT)	None	None	Manual	Yes	Yes	Repeated measures ANOVA One-way ANOVA	SC group in lab =20 SC group in class =11 RAN group in lab=19 RAN group in class =11	None	NCE SC group in lab: pretest: 6.25 (2.88) posttest 1: 9.20 (2.91) posttest 2: 9.05 (1.70) RAN group in lab: pretest: 7.82 (2.94) posttest 1: 10.06 (2.44) posttest 2: 8.80 (2.04) SC group in class: pretest:4.02 (3.1) posttest 1: 8.73 (3.32) posttest 2: 8.56 (3.28) RAN group in class: pretest: 4.3 (3.6) posttest 1: 9.45 (4.55) posttest 2: 8.22 (3.9) ######################### NT SC group in lab: pre…	None	None	None	NCE Lab posttest > pretest delayed posttest > pretest posttest > delayed posttest Posttest: No difference between groups Delayed posttest: No difference between groups Pretest-posttest gains: No difference between groups Pretest-delayed posttest gains: No difference between groups Class posttest > pretest delayed posttest > pretest posttest > delayed posttest Posttest: No difference between group…	None	None	Task complexity, regardless of task sequence, improved all measures (NCE, NT, NCT) immediately after treatment in class and laboratory context, confirming the Cognition Hypothesis for L2 development. Nonetheless, no difference was found between SC and RAN groups in posttest nor in delayed posttest. SC group had a greater improvement from pretest to delayed posttest in NT measure than RAN group in…
Levkina, M. & Gilabert, R. (2014)	Task sequencing in the L2 development of spatial expressions	Book chapter	In M. Baralt, R. Gilabert, P. Robinson, Task sequencing and instructed second language learning (37-70). John Benjamins.	Sequencing tasks based on cognitive task complexity	Robinson's SSARC model Robinson's triadic componential framework Robinson's cognition hypothesis Skehan's trade-off hypothesis	(1) Does task sequencing affect the learning of new target L2 items related to the expression of spatial relations when tasks are organized from cognitively simple to cognitively complex as opposed to other sequences? (2) Does task sequencing contribute to the longer-term retention of learned target items after treatment and over a two-week period when tasks are organized from simple to complex a…	43	18 to 23 years	Spanish	Intermediate	Internal placement test	English	FL	University	Oral	Picture description	Resource-directing variables (± spatial reasoning, ± perspective-taking)	Task 1: Simple (- spatial reasoning, - perspective-taking) Task 2: Medium (+ spatial reasoning, - perspective-taking) Task 3: Complex ( + spatial reasoning, + perspective-taking )	None	Between-subject within-subject pretest-treatment-posttest- delayed posttest design	Pretest-posttest comparison	Experimental	Classroom & Lab	Random assignment		Face-to-face	(1) SC group (2) Complex-to-simple (CS) group (3) RAN group	None	(1) Total number of spatial target expressions (STE) (2) Number of correctly used spatial target expressions (CSTE)	None	None	Manual	Yes	Yes	Kruskal-Wallis tests Wilcoxon signed ranks tests	SC group = 13 CS group = 15 RAN group =15	None	STE SC group: pretest: 2.31 (1.32) posttest: 7.85 (2.58) delayed posttest: 7.0 (2.61) CS: pretest: 1.53 (1.31) posttest: 7.50 (1.29) delayed posttest 2: 7 (1.48) RAN group: pretest: 1.20 (.94) posttest: 6.46 (1.76) delayed posttest: 5.1 (1.79) ############################ CSTE SC group: pretest: 2.0 (1.41) posttest: 5.15 (2.60) delayed posttest: 5.82 (2.60) CS group: pretest: 1.13 (.83) posttest:…	None	None	None	STE SC: posttest > pretest; delayed posttest > pretest CS: posttest > pretest; delayed posttest > pretest RAN: posttest > pretest; delayed posttest > pretest Pretest: No between-group effect Posttest: No between-group effect Delayed posttest: CS > RAN ############################ CSTE SC: posttest > pretest; delayed posttest > pretest CS: posttest > pretest; delayed posttest > pretest RAN: postte…	None	None	SC, CS, & RAN groups significantly improved their knowledge of target spatial expressions (STE, CSTE) in the short and long run; CS group improved their knowledge of target spatial expressions in long run more than RAN group.
Malicka, A. (2014b)	The role of task sequencing in monologic oral production	Book chapter	In M. Baralt, R. Gilabert, P. Robinson, Task sequencing and instructed second language learning (71-93). John Benjamins.	Sequencing tasks based on cognitive task complexity	Robinson's SSARC model Robinson's triadic componential framework Robinson's cognition hypothesis Skehan's trade-off hypothesis	(1) How do the different complexity levels of tasks, as manipulated along ±reasoning demands and ±number of elements, contribute to task performance? (2) Is there interaction between task complexity and sequencing tasks from simple to complex?	50	19 to 25 years	Spanish and Catalan	Intermediate	Oxford Placement Test	English	FL	University	Oral	Decision-making	Resource-directing variables (± few elements and ± reasoning)	Task 1: Simple (+few elements, - reasoning) Task 2: Medium (- few elements, - reasoning) Task 3: Complex (-few elements, +reasoning)	AVQ	Between-subject within-subject mixed design	Task performance comparison	Experimental	Classroom	Random assignment		Face-to-face	(1) SC group (2) RAN group	1) Words per clause (W/C) 2) Words per AS-unit (W/AS)	(1) Error per AS-unit (E/AS) (2) Error per 100 words (E/100W)	(1) D index (DI) (2) Guiraud’s index (GI)	1) Unpruned speech Rate (USR) (2) Pruned speech Rate (PSR) (3) Dysfluency ratio (DsyFlu)	Computer-based (CLAN version of CHILDES)	Not mentioned	Not mentioned	One-way repeated measures ANOVA	SC group = 25 RAN group N = 25	W/C SC group: Simple: 7.43 (1.27) Medium: 6.88 (1.56) Complex: 7.99 (1.97) RAN group: Simple: 7.63 (.78) Medium: 7.0 (.98) Complex: 7.25 (1.14) ###################### W/AS SC group: Simple: 9.29 (1.25) Medium: 9.41 (2.11) Complex: 9.59 (1.46) RAN group: Simple: 9.63 (1.67) Medium: 9.62 (1.49) Complex: 9.54 (1.43)	E/AS SC group: Simple: 1.01 (.63) Medium: .96 (.76) Complex: .84 (.62) RAN group: Simple: 1.11 (.51) Medium: 1.10 (.52) Complex: .95 (.43) ####################### E/100W SC group: Simple: 11.05 (7.12) Medium: 10.06 (5.81) Complex: 8.91 (6.22) RAN group: Simple: 11.78 (5.70) Medium: 11.68 (5.81) Complex: 10.42 (6.29)	DI SC group: Simple: 44.79 (12.01) Medium: 47.93 (12.32) Complex: 53.34 (12.68) RAN group: Simple: 45.78 (14.19) Medium: 51.05 (12.83) Complex: 57.18 (12.40) ####################### GI SC group: Simple: 2.45 (.39) Medium: 2.24 (.32) Complex: 2.59 (.63) RAN group: Simple: 2.47 (.27) Medium: 2.26 (.30) Complex: 2.36 (.37)	USR SC group: Simple: 120.75 (27.29) Medium: 129.87 (45.29) Complex: 116.34 (34.44) RAN group: Simple: 122.27 (23.27) Medium: 128.21 (33.58) Complex: 109.68 (34.47) ############################## PSR SC group: Simple: 112.51 (26.61) Medium: 117.83 (42.01) Complex: 105.65 (31.62) RAN group: Simple: 114.54 (22.5) Medium: 118.64 (30.96) Complex: 102.0 (33.74) ############################## DsyFlu SC…	W/C Simple > Medium Complex > Medium No difference between RAN and SC groups ###################### W/AS No difference across tasks No difference between RAN and SC groups	E/AS Simple > Complex Medium > Complex No difference between RAN and SC groups ####################### E/100W Simple > Complex Medium > Complex No difference between RAN and SC groups	DI Medium > Simple Complex > Simple Complex > Medium No difference between RAN and SC groups ####################### GI Simple > Medium Complex > Medium No difference between RAN and SC groups	USR Simple > Complex Medium > Complex No difference between RAN and SC groups ############################## PSR Simple > Complex Medium > Complex No difference between RAN and SC groups ############################## DsyFlu Medium > Simple Medium > Complex No difference between RAN and SC groups	The most complex task, irrespective of its place in the order, led to greater gains in accuracy, lexical complexity, and syntactic complexity and deteriorated fluency, confirming the prediction of Cognition hypothesis (simultaneous increase in complexity and accuracy to the detriment of fluency). However, SC sequence did not yield greater qualitative changes compared to RAN sequence. These result…
Thompson, C. (2014b)	The effects of guided planning, task complexity, and task sequencing on L2 oral production	Book chapter	In M. Baralt, R. Gilabert, P. Robinson, Task sequencing and instructed second language learning (123-148). John Benjamins.	Sequencing tasks based on cognitive task complexity	Kormos’ bilingual model of oral production (adapted from Levelt’s model of L1 production) Robinson's triadic componential framework Robinson's cognition hypothesis Skehan's trade-off hypothesis Skehan's limited attentional capacity Skehan's task difficulty	(1) To what extent can oral narratives facilitate task usefulness of relativization (in Mochizuki and Ortega’s 2008 sense) for Japanese second-year University learners of English? (2) To what extent does guided planning and task complexity facilitate L2 oral production in terms of structural complexity compared to guided/unguided planning and task complexity? (3) To what extent do Japanese Univer…	24 (8 males and 16 females)	19 to 21 years	Japanese	Intermediate	Internal placement test	English	FL	University	Oral	Picture narrative	Resource-directing variable ( ± intentional reasoning) Resource-dispersing variable (± planning)	Task 1: Simple (least intentional reasoning, most un/guided planning time) Task 2: Medium (more intentional reasoning, less un/guided planning time) Task 3: Complex (most intentional reasoning, least un/guided planning time)	Task difficulty questionnaire	Between-subject within-subject pretest-treatment-posttest- delayed posttest design	Pretest-posttest comparison	Quasi-experimental	Classroom	Not mentioned		Face-to-face	(1) SC guided planning (SCG) group (2) SC unguided planning (SCU) group	(1) Relative clauses per AS-Unit (C/AS)	None	None	None	Computer-based (CLAN)	Not mentioned	Yes	Paired samples t-tests	SCG group = 12 SCU group = 12	C/AS SCG group: pretest: .06 (.17) posttest: .76 (.13) delayed posttest: .76 (.06) SCU group: pretest: .04 (.10) posttest: .66 (.26) delayed posttest: .74 (.35)	None	None	None	C/AS SCG: posttest > pretest; delayed posttest > pretest SCU: posttest > pretest; delayed posttest > pretest	None	None	None	SC with or without guiding planning improved syntactic complexity (C/AS) and both treatments brought about approximately similar gains.
Farahanynia, M. (2019)	The impact of task complexity and task sequencing on L2 written performance: Examining the SSARC model of task sequencing	Presentation	The 17th International Teaching English Language and Literature Society of Iran Conference, Tabriz Islamic University, Tabriz, Iran.	Sequencing tasks based on cognitive task complexity	Robinson's SSARC model Robinson's triadic componential framework Robinson's cognition hypothesis Skehan's trade-off hypothesis Kellogg's model of writing	(1) How do tasks with different cognitive complexity levels along reasoning demands and planning impact on performance in terms of fluency, accuracy, syntactic complexity, and lexical diversity (CALF)? (2) Do sequencing orders of tasks (randomized vs. simple-to-complex sequence) affect performance in terms of fluency, accuracy, syntactic complexity, and lexical diversity (CALF)?	80 (47 females 33 males)	23 to 35 years	Persian	Intermediate	Preliminary English Test	English	FL	Language institute	Written	Decision-making	Resource-directing variable ( ± reasoning) Resource-dispersing variable (± planning)	Task 1: Simple (+ planning, - reasoning) Task 2: Medium (-planning & - reasoning) Task 3 (- planning & + reasoning)	AVQ TJT SR	Between-subject within-subject mixed design	Task performance comparison	Experimental	Classroom	Random assignment		Face-to-face	(1) SC group (2) RAN group	(1) Clauses per AS-unit (C/AS)	(1) Error-free ratio (EFC)	(1) Guiraud’s Index (GI)	(1) Speech rate (SR)	Manual	Yes	Yes	Two-way repeated-measures ANOVAs	SC group = 40 RAN group = 40	C/AS SC group: Simple:1.29 (.04) Medium: 1.33 (.02) Complex:1.42 (.03) RAN group: Simple:1.28 (.06) Medium: 1.34 (.07) Complex:1.67 (.07)	EFC SC group: Simple: 45.5 (8.2) Medium: 47.4 (10.7) Complex: 95.6 (9.2) RAN group: Simple: 48.2 (6.6) Medium: 46.2 (8.4) Complex: 59.8 (4.5)	GI SC group: Simple: 4.04 (.7) Medium: 4.19 (.27) Complex: 5.23 (.27) RAN group: Simple:4.42 (1.0) Medium: 4.35 (.4) Complex: 5.95 (.5)	SR SC group: Simple: 81.7 (7) Medium: 83.9 (4.6) Complex: 82.7 (5.3) RAN group: Simple:94.6 (8.6) Medium: 96.6 (6.7) Complex: 93.5 (7.7)	C/AS RAN > SC SC: Complex > Simple, Complex > Medium RAN: Complex > Simple, Complex > Medium	EFC SC > RAN SC: Complex > Simple, Complex > Medium RAN: Complex > Simple, Complex > Medium	GI RAN > SC SC: Complex > Simple, Complex> Medium RAN: Complex > Simple, Complex > Medium	SR RAN >SC SC: No difference across tasks RAN: No difference across tasks	Both SC and RAN sequences raised accuracy (EFC), syntactic complexity (C/AS), and lexical diversity (GI) but left fluency unaffected. RAN sequence outperformed SC sequence in all measures but accuracy. These results indicate a trade-off between accuracy ad fluency.
Faruji, L. F., & Ghaemi, F. (2017)	Task Complexity Manipulation and Accuracy in Writing Performance	Article B	Journal of Teaching Language Skills	Sequencing tasks based on cognitive task complexity	Robinson's triadic componential framework Robinson's cognition hypothesis	(1) Does manipulating task complexity along the resource-directing dimension (+/-reasoning demands) have any significant impact on EFL learners’ writing task performance in terms of accuracy?	90	20 to 32 years	Persian	Intermediate	Preliminary English Test	English	FL	University	Written	Picture narrative	Resource-directing variable ( ± intentional reasoning)	Task 1: Simple (least intentional reasoning) Task 2: Medium (more intentional reasoning) Task 3 (most intentional reasoning)	None	Between-subject within subject pretest-treatment-posttest design	Pretest-posttest comparison	Quasi-experimental	Classroom	Not mentioned		Face-to-face	(1) SC group (2) RAN group (3) Control group	None	(1) Error-free t-units per total number of T-units (EFT)	None	None	Manual	Yes	Yes	Kruskal-Wallis Test ANOVA	SC group = 30 RAN group = 30 Control group = 30	None	EFT SC group: pretest: .53 (.25) posttest: .76 (.19) RAN group: pretest: .51 (.12) posttest: .61 (.11) Control group: pretest: .47 (.13) posttest: .53 (.13)	None	None	None	EFT SC > RAN SC > Control No difference between RAN & Control	None	None	SC outperformed RAN and Control groups in accuracy (EFT)
Allaw, E.(2017)	The effect of the SSARC model of task sequencing on L2 written production	Dissertation	Concordia University, Canada	Sequencing tasks based on cognitive task complexity	Robinson's SSARC model Robinson's triadic componential framework Robinson's cognition hypothesis Skehan's trade-off hypothesis	(1) Does the SSARC model of task sequencing encourage French L2 students to use new lexical and grammatical forms in writing and will it, in turn, lead to higher accuracy, fluency, and complexity of written production?	42 (18 males and 24 females)	average age of 13.32	Arabic	Elementary	None	French	FL	Elementary school	Written	Picture description	Resource-directing variable (± spatial reasoning) Resource-dispersing variable (± task structure)	Task 1: Simple (+ spatial reasoning, + task structure) Task 2: Medium (+ spatial reasoning, - task structure) Task 3: Complex (- spatial reasoning, - task structure)	AVQ	Between-subject within-subject pretest-treatment-posttest- delayed posttest design	Pretest-posttest comparison	Quasi-experimental	Classroom	Random assignment		Face-to-face	(1) SC group (2) CS group	(1) Number of relative subordinate clauses per word (C/W)		(1) Number of different spatial expressions (NSE)	(1) Words in each paragraph per 30 minutes (W/30min)	Manual	Yes	Not mentioned	Repeated measures ANOVA	SC group = 21 CS group =21	C/W SC group: pretest: .0 (.0) posttest: .02 (.01) delayed posttest: .02 (.401) CS group: pretest: .01 (.01) posttest: .02 (.01) delayed posttest: .03 (.01)	C/C SC group: pretest: .0 (.00) posttest: 95.63 (9.72) delayed posttest: 76.03 (21.89) CS group: pretest: .0 (.00) posttest: 77.69 (23.15) delayed posttest: 51.50 (38.26)	NSE SC group: pretest: 1.09 (.76) posttest: 5.38 (1.90) delayed posttest: 2.20 (.92) CS group: pretest: 1.19 (.87) posttest: 2.04 (1.5) delayed posttest: 1.04 (.74)	W/30MIN SC group: pretest: 59.57 (11.48) posttest: 155.04 (30.28) delayed posttest: 93.95 (14.5) CS group: pretest: 62.47 (11.38) posttest: 116.57 (19.85) delayed posttest: 78.57 (9.98)	C/W posttest > pretest delayed posttest > pretest SC: posttest > pretest; delayed posttest > pretest CS: delayed posttest > pretest	C/C pretest: no difference between groups posttest: SC > CS delayed posttest: SC > CS SC: posttest > pretest; delayed posttest > pretest; posttest > delayed posttest CS: posttest > pretest; delayed posttest > pretest	NSE pretest: no difference between groups posttest: SC > CS delayed posttest: SC > CS SC: posttest > pretest; delayed posttest > pretest; posttest > delayed posttest CS: No effect	W/30MIN pretest: no difference between groups posttest: SC > CS delayed posttest: SC > CS SC: posttest > pretest; delayed posttest > pretest; posttest > delayed posttest CS: posttest > pretest; delayed posttest > pretest; posttest > delayed posttest	SC sequencing improved all measures, and CS sequencing improved syntactic complexity, accuracy, and fluency over time. SC sequence led to more accurate, lexically complex, and fluent output than CS sequence, especially in immediate posttest. But SC and CS led to similar results regarding complexity, indicating that task order is irrelevant to syntactic complexity.
Lee, J. (2021)	Task Sequencing and Task Complexity Effects on L2 Writing: Does Task Order Really Matter?	Article B	The Journal of Asia TEFL	Sequencing tasks based on cognitive task complexity	Robinson's SSARC model Robinson's triadic componential framework Robinson's cognition hypothesis Skehan's trade-off hypothesis Kellogg's model of writing	(1) What are the effects of task sequencing on the cognitive load of the task? (2) What are the effects of task sequencing on the syntactic complexity of L2 writing? (3) What are the effects of task sequencing on the lexical diversity of L2 writing? (4) Do the effects of task sequencing interact with those of task complexity?	88 (59 males and 29 females)		Korean	Low-intermediate	Brown’s 50-item cloze test	English	FL	University	Written	Decision-making	Resource-directing variable (± few elements)	Task 1: Simple (fewest elements) Task 2: Medium (several elements) Task 3: Complex (most elements)	TJT	Between-subject within-subject mixed design	Task performance comparison	Quasi-experimental	Classroom	Not mentioned		Face-to-face	(1) SC group (2) CS group	(1) Mean length of T-units (MLT) (2) Number of subordinate clauses per T-unit (C/T) (3) Number of nominals per T-unit (Nominals/T) (4) Number of adjectivals per T-unit (Adjectival/T) (5) Number of adverbials per T-unit (Adverbials/T)	None	(1) Type-token ratio (TTR) (2) Guiraud’s Index (GI) (3) Academic word list (4) K1 tokens (5) K2 tokens (6) Off-list tokens	None	Manual & Computer-based (VocabProfile)	Yes	Not mentioned	Repeated-measures ANCOVA	SC group = 43 CS group = 45	MLT SC group: Simple: 9.09 (2.99) Medium: 8.87 (3.16) Complex:9.24 (2.93) CS group: Simple: 8.18 (2.26) Medium: 7.23 (2.19) Complex: 9.49 (3.37) ######################### C/T SC group: Simple: .65 (.42) Medium: 1.16 (.62) Complex: .73 (.48) CS group: Simple: .57 (.39) Medium: .82 (.45) Complex: .62 (.51) ######################## Nominals/T SC group: Simple:.15 (.16) Medium: .50 (.28) Complex:.25 …	None	TTR SC group: Simple:.60 (.10) Medium: .48 (.08) Complex:.43 (.08) c-s group: Simple:.65 (.11) Medium: .52 (.10) Complex:.46 (.10) ###################### GI SC group: Simple:4.37 (.59) Medium: 4.17 (.65) Complex:4.51 (.67) CS group: Simple:4.60 (.65) Medium: 4.43 (.71) Complex:5.00 (.82) ####################### K1 tokens SC group: Simple: 53.58 (18.15) Medium: 73.48 (17.14) Complex: 108.28 (26.41…	None	MLT Simple: No difference between groups Medium: SC > CS Complex: No difference between groups SC: No difference across tasks CS: Complex > Simple > Medium ######################### C/T Simple: No difference between groups Medium: SC > CS Complex: No difference between groups SC: Medium > Simple; Medium > Complex CS: Medium > Simple; Medium > Complex ######################## Nominals/T No effect …	None	TTR No effect ###################### GI No effect ####################### K1 tokens Simple: SC > CS Medium: SC > CS Complex: SC > CS SC: No difference across tasks CS: No difference across tasks ###################### K2 tokens No effect ####################### AWL tokens Simple: No effect Medium: No effect Complex: CS > SC SC: No difference across tasks CS: Complex > Medium > Simple ############…	None	As for syntactic complexity, SC outperformed CS in global measures (MLT and C/T) on Medium task and in local measure (Adverbials/T) on Simple task. However, CS outperformed SC in local measure (Adjectivals/T) on Simple task. Different behaviors are observed between the two global and local measures of syntactic complexity between groups. SC improved syntactic complexity (C/T, Adjectivals/T) on Me…
Abdi Tabari, M. & Cho, M. (2022)	Task sequencing and L2 writing development: Exploring the SSARC model of pedagogic task sequencing	Article A	Language Teaching Research	Sequencing tasks based on cognitive task complexity	Robinson's SSARC model Robinson's triadic componential framework Robinson's cognition hypothesis Skehan's trade-off hypothesis Kellogg's model of writing	(1) Does performing writing tasks in simple-to-complex sequencing versus complex-to-simple sequencing affect the syntactic complexity, accuracy, lexical complexity, and fluency of L2 learners’ writing over time? If so, how? (2) Does performing writing tasks in simple-to-complex or complex-to-simple sequences affect the syntactic complexity, accuracy, lexical complexity, and fluency of L2 learners…	100 (44 males and 56 females)	18 to 20 years	China= 32, Korea = 12, Japan = 10, Turkey= 8, Brazil=7, Russia= 7, Morocco= 5, Ecuador= 4, Egypt = 4, Poland = 3, India = 3, Hungary = 2, Spain = 2, and Lebanon= 1	Advanced-mid	International English Language Testing System (IELTS)	English	SL	University	Written	Decision-making	Resource-directing variable ( ± few elements) Resource-dispersing variable (± planning)	Task 1: Simple task (+ few elements, + planning) Task 2: Medium (+ few elements, - planning) Task 3: Complex (- few elements, - planning)	AVQ Expert opinion	Between-subject within-subject mixed design	Task performance comparison	Experimental	Classroom	Random assignment		Face-to-face	(1) SC group (2) CS group (3) No group	(1) Mean length of clause (MLC) (2) Number of complex nominals per T-unit (CN/T)	(1) Error-free clauses (EFC) (2) Correct verb forms (CVF)	(1) Measure of textual lexical diversity (MTLD) (2) log frequency of content words (WRDF)	(1) Words produced within a set time (W/M)	Computer-based (Coh-Metrix 3.0)	Yes	Yes	Factorial MANOVA Independent samples t-tests	SC group = 20 CS group = 20 No group = 60	MLC WEEK 1 SC group: Simple: 8.54 (1.15) Medium: 8.63 (1.16) Complex: 8.76 (2.02) CS group: Simple: 8.50 (1.15) Medium: 8.47 (1.22) Complex: 8.35 (1.32) No group: Simple: 8.13 (.85) Medium: 8.15 (.91) Complex:7.94 (.77) WEEK 2 SC group: Simple: 8.56 (1.12) Medium: 8.86 (1.48) Complex:8.94 (1.95) CS group: Simple: 8.49 (1.00) Medium: 8.54 (1.31) Complex: 8.44 (.93) No group: Simple: 8.41 (1.12) Me…	EFC WEEK 1 SC group: Simple: .55 (.06) Medium: .57 (.10) Complex:.64 (.10) CS group: Simple: .54 (.10) Medium: .57 (.08) Complex: .51 (.08) No group: Simple: .52 (.08) Medium: .48 (.10) Complex: .45 (.08) WEEK 2 SC group: Simple: .56 (.09) Medium: .58 (.05) Complex:.64 (.10) CS group: Simple: .59 (.11) Medium: .54 (.10) Complex:.52 (.10) No group: Simple: .51 (.07) Medium: .50 (.06) Complex:.47 (…	MTLD WEEK 1 SC group: Simple: 78.06 (8.88) Medium: 73.48 (9.11) Complex:77.41 (12.50) CS group: Simple: 74.46 (5.63) Medium: 70.11 (6.58) Complex:72.06 (8.07) No group: Simple: 69.52 (10.59) Medium: 73.75 (10.81) Complex:69.11 (7.59) WEEK 2 SC group: Simple: 77.14 (12.06) Medium: 75.46 (12.21) Complex:78.12 (12.10) CS group: Simple: 65.71 (13.19) Medium: 68.45 (9.52) Complex:71.51 (10.20) No grou…	W/M WEEK 1 SC group: Simple: 11.42 (.68) Medium: 11.17 (1.08) Complex: 10.95 (.89) CS group: Simple: 11.18 (.65) Medium: 10.86 (.63) Complex:11.05 (.98) No group: Simple: 10.44 (.65) Medium: 10.30 (.70) Complex:10.22 (.73) WEEK 2 SC group: Simple: 11.29 (2.12) Medium: 11.03 (1.25) Complex: 10.95 (1.28) CS group: Simple: 10.85 (.55) Medium: 10.56 (.42) Complex: 10.55 (.80) No group: Simple: 10.60 …	MLC WEEK1 Simple: No effect Medium: No effect Complex: No effect WEEK2 Simple: No effect Medium: SC > CS Complex: SC > No WEEK3 Simple: No effect Medium: SC > CS Complex: SC > No; SC > CS ######################## CN/T WEEK 1 Simple: No effect Medium: No effect Complex: No effect WEEK2 Simple: No effect Medium: No effect Complex: SC > No; SC > CS WEEK 3 Simple: CS > No Medium: SC > No; CS > No Com…	EFC WEEK1 Simple: No effect Medium: SC > No; CS > No Complex: SC > No; CS > No; SC > CS WEEK2 Simple: SC > No; CS > No Medium: SC > No Complex: SC > No; CS > No; SC > CS WEEK3 Simple: CS > No Medium: SC > No; CS > No; SC > CS Complex: SC >No; CS > No; SC > CS ######################## CVF WEEK 1 Simple: No effect Medium: SC > No; CS > No Complex: SC > No; CS > No; SC > CS WEEK2 Simple: SC > No; CS…	MLTD WEEK1 Simple: SC > No Medium: No effect Complex: SC > No WEEK2 Simple: SC > No; SC > CS Medium: SC > No; CS > No Complex: SC > No; CS > No WEEK3 Simple: SC > No; CS > No Medium: CS > No Complex: SC >No; CS > No; SC > CS ######################## WRDF WEEK 1 Simple: SC > No Medium: No effect Complex: SC > No WEEK2 Simple: No effect Medium: No effect Complex: SC > No; SC > CS WEEK 3 Simple: SC …	W/T WEEK1 Simple: SC > No; CS > No Medium: SC > No; CS > No Complex: SC > No; CS > No WEEK2 Simple: No effect Medium: No effect Complex: No effect WEEK3 Simple: No effect Medium: SC > No Complex: SC >No; CS > No	SC sequencing improved syntactic complexity and accuracy over time more than CS group, revealing the synergistic impacts of task sequencing over time. Each of the SC and CS groups outperformed No sequence group in CALF, and on medium and complex tasks, the differences between SC and No sequence groups and between CS and No sequence groups were more evident in terms of CALF. These results supports…
Abdi Tabari, M. & Miller, M. (2021)	Unraveling the Effects of Task Sequencing on the Syntactic Complexity, Accuracy, Lexical Complexity, and Fluency of L2 Written Production	Article A	Canadian Journal of Applied Linguistics linguistics	Sequencing tasks based on cognitive task complexity	Robinson's SSARC model Robinson's triadic componential framework Robinson's cognition hypothesis Skehan's trade-off hypothesis Skehan’s limited attentional capacity model	(1) What is the effect of simple ̶ complex task sequencing on the syntactic complexity, accuracy, lexical complexity, and fluency of L2 written production when compared to individual task performance?	90 (46 females and 44 males)	average age of 20.6	China = 8, South Korea = 7, France= 6, Japan= 5, Scandinavia = 5, Spain = 4), Russia = 3, Iran = 2, Poland= 2, Holland = 2, Nigeria = 1	Upper-intermediate	Test of English as a Foreign Language (TOEFL-iBT)	English	SL	University	Written	Decision-making	Resource-directing variable ( ± few elements) Resource-dispersing variable (± planning)	Task 1: Simple task (+ few elements, + planning) Task 2: Medium (+ few elements, - planning) Task 3: Complex (- few elements, - planning)	AVQ SR Expert opinion	Between-subject within-subject mixed design	Task performance comparison	Experimental	Classroom	Random assignment		Face-to-face	(1) SC group (2) No group	(1) Mean length of T-unit (MLT) (2) Ratio of dependent clauses to T-units (DC/T) (3) Number of complex nominals per T-unit (CN/T) (4) the number of complex nominals per clause (CN/C)	(1) Ratio of error-free clauses to the total number of clauses (EFC) (2) Ratio of correct verb forms to the total number of verbs (CVF)	(1) Measure of textual lexical diversity (MTLD) (2) log frequency of content words (WRDF)	(1) Number of words per T-unit (W/T)	Manual	Not mentioned	Yes	The Mann-Whitney U test	SC group = 30 No group = 60	MLT SC group: Simple: 16.72 (1.63) Medium: 14.72 (2.06) Complex: 13.74 (1.36) Ind group: Simple: 15.07 (1.3) Medium: 12.82 (.89) Complex:13.15 (1.69) ##################### DC/T SC group: Simple:.63 (.11) Medium: .54 (.1) Complex:.49 (.11) Ind group: Simple:.6 (.05) Medium: .44 (.05) Complex:.4 (.06) ######################### CN/C SC group: Simple: 1.39 (.34) Medium: 1.14 (.37) Complex:1.03 (.25) …	EFC SC group: Simple: .63 (.08) Medium: .54 (.08) Complex:.54 (.09) Ind group: Simple: .65 (.14) Medium: .56 (.09) Complex: .46 (.08) ############################ CVF SC group: Simple: .65 (.08) Medium: .57 (.06) Complex: .56 (.08) No group: Simple: .64 (.1) Medium: .6 (.1) Complex: .48 (.1)	MLTD SC group: Simple: 74.19 (15.04) Medium: 74.68 (15.21) Complex:78.74 (9.52) Ind group: Simple: 66.5 (5.13) Medium: 68.22 (4.18) Complex:73.67 (4.99) ####################### WRDF SC group: Simple: 1.59 (.23) Medium: 1.45 (.27) Complex:1.64 (.28) No group: Simple: 1.62 (.17) Medium: 1.31 (.08) Complex: 1.56 (.05)	W/T SC group: Simple: 264.83 (16.89) Medium: 243.9 (55.83) Complex:252.03 (37.41) No group: Simple: 251.05 (27.69) Medium: 245.5 (21.79) Complex:243.25 (40.97)	MLT Simple: SC > No Medium: SC > No Complex: No effect ##################### DC/T Simple: No effect Medium: SC > No Complex: SC > No ######################### CN/C No effect ########################## CN/T No effect	EFC Simple: No effect Medium: No effect Complex: SC >No ############################ CVF Simple: No effect Medium: No effect Complex: SC >No	MLTD Simple: SC > No Medium: No effect Complex: SC >No ####################### WRDF Simple: No effect Medium: No effect Complex: SC > No	W/T Simple: SC > No Medium: No effect Complex: No effect	SC sequencing elevated syntactic complexity (MLT, DC/T), lexical complexity (MTLD, WRDF), accuracy (EFC, CVF), and fluency (W/T) more than No sequence, providing empirical evidence supporting the theoretical claim of the SSARC model regarding the beneficial role of SC task sequencing for L2 written production.
Allaw E. & McDonough K. (2019)	The effect of task sequencing on second language written lexical complexity, accuracy, and fluency.	Article A	System	Sequencing tasks based on cognitive task complexity	Robinson's SSARC model Robinson's triadic componential framework Robinson's cognition hypothesis	(1) What is the effect of task sequencing on novice L2 French writers’ lexical diversity, accuracy, and fluency?	42 (18 males and 24 females)	13 to 14 years	Arabic	Elementary	None	French	FL	Elementary school	Written	Picture description	Resource-directing variable (± spatial reasoning) Resource-dispersing variable (± task structure)	Task 1: Simple (+ spatial reasoning, + task structure) Task 2: Medium (+ spatial reasoning, - task structure) Task 3: Complex (- spatial reasoning, - task structure)	AVQ	Between-subject within-subject pretest-treatment-posttest- delayed posttest design	Pretest-posttest comparison	Quasi-experimental	Classroom	Random assignment		Face-to-face	(1) SC group (2) CS group	None	(1) Correct relative clauses per total number of relative clauses (C/C)	(1) Number of different spatial expressions (NSE)	(1) Words in each paragraph per 30 minutes (W/30min)	Manual	Yes	Not mentioned	Repeated meaures ANOVA	SC group = 21 CS group =21	None	C/C SC group: pretest: .43 (.50) posttest: 2.05 (.74) delayed posttest: .81 (.40) CS group: pretest: .38 (.49) posttest: 1.38 (.59) delayed posttest: 1.00 (.0)	NSE SC group: pretest: 1.09 (.76) posttest: 5.38 (1.90) delayed posttest: 2.20 (.92) CS group: pretest: 1.19 (.87) posttest: 2.04 (1.5) delayed posttest: 1.04 (.74)	W/30MIN SC group: pretest: 59.57 (14.08) posttest: 155.04 (30.28) delayed posttest: 93.95 (14.5) CS group: pretest: 62.47 (11.38) posttest: 116.57 (19.85) delayed posttest: 78.57 (9.98)	None	C/C pretest: no difference between groups posttest: SC > CS delayed posttest: no difference between groups SC: posttest > pretest; delayed posttest > pretest; postest > delayed posttest CS: posttest > pretest; delayed posttest > pretest; postest > delayed posttest	NSE pretest: no difference between groups posttest: SC > CS delayed posttest: SC > CS SC: posttest > pretest; delayed posttest > pretest; postest > delayed posttest CS: No effect	W/30MIN pretest: no difference between groups posttest: SC > CS delayed posttest: SC > CS SC: posttest > pretest; delayed posttest > pretest; postest > delayed posttest CS: posttest > pretest; delayed posttest > pretest; postest > delayed posttest	SC and CS sequencing improved all measures over time. SC sequence led to more accurate, lexically complex, and fluent output than CS sequence, especially in immediate posttest. Note: As the results of lexical complexity and fluency were the same as those of Allaw (2017), they were excluded from the meta-analysis.
Thompson, C. (2014a)	Guided planning, task complexity and second language oral development.	Dissertation	Josai International University, Japan	Sequencing tasks based on cognitive task complexity	Robinson's triadic componential framework Skehan's Task difficulty Skehan's trade-off hypothesis Skehan’s limited attentional capacity model	(1) To what extent does guided planning and task complexity facilitate L2 oral development in terms of fluency, morphological accuracy involving OS and OPREP RC types and 3rd person singular and plural, as well as syntactic complexity for second year Japanese university learners of English? (2) what strategies do Japanese second year university learners of English use when planning for oral narra…	24	18 to 22 years	Japenese	Upper-intermediate	Personal interview	English	FL	University	Oral	Picture narrative	Resource-directing variable ( ± intentional reasoning) Resource-dispersing variable (± planning)	Task 1: Simple (least intentional reasoning, most un/guided planning time) Task 2: Medium (more intentional reasoning, less un/guided planning time) Task 3: Complex (most intentional reasoning, least un/guided planning time)	SR	Between-subject within-subject pretest-treatment-posttest- delayed posttest design	Pretest-posttest comparison	Quasi-experimental	Classroom	Random assignment		Face-to-face	(1) SCG group (2) SCU group	(1) Relative clauses per AS-unit (C/AS)	(1) Error-free relative clauses (EFC) (morphological accuracy)	none	(1) Pruned speech rate (PSR)	Compter-based (CLAN)	Yes	Yes	Paired samples t-tests	SCG group = 12 SCU group = 12	C/AS SCG group: pretest: .06 (.17) posttest: .76 (.13) delayed posttest: .76 (.06) SCU group: pretest: .04 (.10) posttest: .66 (.26) delayed posttest: .74 (.35)	EFC SCG group: pretest: 7.15 (2.30) posttest: 39.69 (6.69) delayed posttest: 42.08 (6.81) SCU group: pretest: 6.85 (2.54) posttest: 33.31 (11.92) delayed posttest: 32.85 (11.97)	None	PSR SCG group: pretest: 28.65 (7.93) posttest: 57.51 (13.20) delayed posttest: 57.12 (12.01) SCU group: pretest: 37.96 (14.20) posttest: 54.41 (10.18) delayed posttest: 56.96 (12.27)	C/AS SCG: posttest > pretest; delayed posttest > pretest; SCU: posttest > pretest; delayed posttest > pretest;	EFC SCG: posttest > pretest; delayed posttest > pretest; SCU: posttest > pretest; delayed posttest > pretest;	None	PSR SCG: posttest > pretest; delayed posttest > pretest; SCU: posttest > pretest; delayed posttest > pretest;	SC sequencing with or without guided planning improved sytactic complexity, fluency, and morphological accuracy.
